# Supplementary material for: Antimicrobial-Resistant Bacteria from Free-Living Green Turtles (Chelonia mydas)
Source: MDPI journal article supplement (doi:10.3390/antibiotics12081268), 2023-08-01

**Table S1:** Species identified using MALDI-TOF and 16S rRNA Sanger sequencing.

| Neck                       |                    |                                        |                                |
|----------------------------|--------------------|----------------------------------------|--------------------------------|
| Species                    | Number of isolates | MALDI-TOF identification:<br>N (score) | 16S rRNA<br>N (bp /% Identity) |
| <i>C. freundii</i>         | 2                  | 2 (2.262)                              | –                              |
| <i>E. coli</i>             | 1                  | 1 (1.835)                              | –                              |
| <i>Salmonella</i> sp.      | 1                  | 1 (1.842)                              | –                              |
| <i>S. ureylitica</i>       | 1                  | 1 (2.281)                              | –                              |
| <i>P. mirabilis</i>        | 1                  | 1 (2.010)                              | –                              |
| <i>E. faecalis</i>         | 8                  | 6 (2.255)                              | 2 (504/97)                     |
| <i>Microbacterium</i> spp. | 5                  | –                                      | 5 (423/98)                     |
| <i>C. cellulans</i>        | 8                  | 5 (2.035)                              | 3 (504/99)                     |

  

| Cloaca                |                    |                                       |                                |
|-----------------------|--------------------|---------------------------------------|--------------------------------|
| Species               | Number of isolates | MALDI-TOF identification<br>N (score) | 16S rRNA<br>N (bp /% Identity) |
| <i>C. braaki</i>      | 2                  | 2 (2.043)                             | –                              |
| <i>C. freundii</i>    | 20                 | 20 (2.281)                            | –                              |
| <i>K. oxytoca</i>     | 1                  | 1 (2.202)                             | –                              |
| <i>K. variicola</i>   | 1                  | 1 (1.887)                             | –                              |
| <i>Salmonella</i> sp. | 1                  | 1 (1.771)                             | –                              |
| <i>S. marcescens</i>  | 1                  | 1 (2.405)                             | –                              |
| <i>M. morganii</i>    | 40                 | 39 (2.180)                            | 1 (446/98)                     |
| <i>P. mirabilis</i>   | 14                 | 14 (2.277)                            | –                              |
| <i>E. faecalis</i>    | 9                  | 7 (2.199)                             | 2 (516/94)                     |
| <i>E. hirae</i>       | 2                  | 1 (2.464)                             | 1 (390/98)                     |
| <i>L. garvieae</i>    | 1                  | 1 (2.098)                             | –                              |

N, number of isolates; score, score values; bp, base pair; % Identity of the query with reference

**Table S2.** Metadata of the 16 captured green turtles.

| Turtles            | Left Fin Tag | Right Fin Tag | Weight (kg) | CCL (cm) | CCW (cm) | Samples* |
|--------------------|--------------|---------------|-------------|----------|----------|----------|
| <i>C. mydas</i> 1  | BR84264      | BR85265       | 96.6        | 92.0     | 80.5     | 1C/1N    |
| <i>C. mydas</i> 2  | BRA18245     | BR97696       | 30.9        | 56.1     | 63.2     | 2C/2N    |
| <i>C. mydas</i> 3  | BRA18260     | BRA18259      | 74.5        | 71.6     | 82.1     | 3C/3N    |
| <i>C. mydas</i> 4  | BRA18216     | BRA18215      | 22.5        | 49.9     | 56.8     | 4C/4N    |
| <i>C. mydas</i> 5  | BR97680      | BR97679       | 32.9        | 64.0     | 64.2     | 5C/5N    |
| <i>C. mydas</i> 6  | BR97657      | BR97689       | 42.5        | 66.8     | 59.5     | 6C/6N    |
| <i>C. mydas</i> 7  | BRA17672     | BRA18262      | 31.8        | 54.4     | 62.1     | 7C/7N    |
| <i>C. mydas</i> 8  | BR97684      | BR97683       | 36.5        | 64.0     | 55.7     | 8C/8N    |
| <i>C. mydas</i> 9  | BR84237      | BR84238       | 70.0        | 73.9     | 74.7     | 9C/9N    |
| <i>C. mydas</i> 10 | BRA18254     | BRA18253      | 28.0        | 42.8     | 40.4     | 10C/10N  |
| <i>C. mydas</i> 11 | BRA18214     | BRA18212      | 16.9        | 49.2     | 43.9     | 11C/11N  |
| <i>C. mydas</i> 12 | BR97674      | BR97673       | 28.5        | 50.4     | 59.5     | 12C/12N  |
| <i>C. mydas</i> 13 | BRA18237     | BRA18238      | 40.3        | 65.0     | 69.4     | 13C/13N  |
| <i>C. mydas</i> 14 | BRA18220     | BRA18219      | 12.6        | 49.3     | 50.5     | 14C/14N  |
| <i>C. mydas</i> 15 | BR97667      | BRA18232      | 40.9        | 61.6     | 69.7     | 15C/15N  |
| <i>C. mydas</i> 16 | BR97678      | BRA18218      | 28.4        | 60.4     | 51.4     | 16C/16N  |
| Average            |              |               | 39.6        | 60.7     | 61.5     |          |
| Median             |              |               | 32.3        | 61.0     | 60.8     |          |
| Stdev              |              |               | 22.4        | 12.2     | 11.9     |          |

\*C - cloaca, N - neck

**Figure S1:** Map of study location. **A**, Map of South America, showing Brazilian coast, highlighting Rio de Janeiro state littoral; **B**, Rio de Janeiro state shoreline, highlighting Guanabara Bay; **C**, Guanabara Bay, highlighting (red dot) Itaipú Beach, where the green turtles were captured.

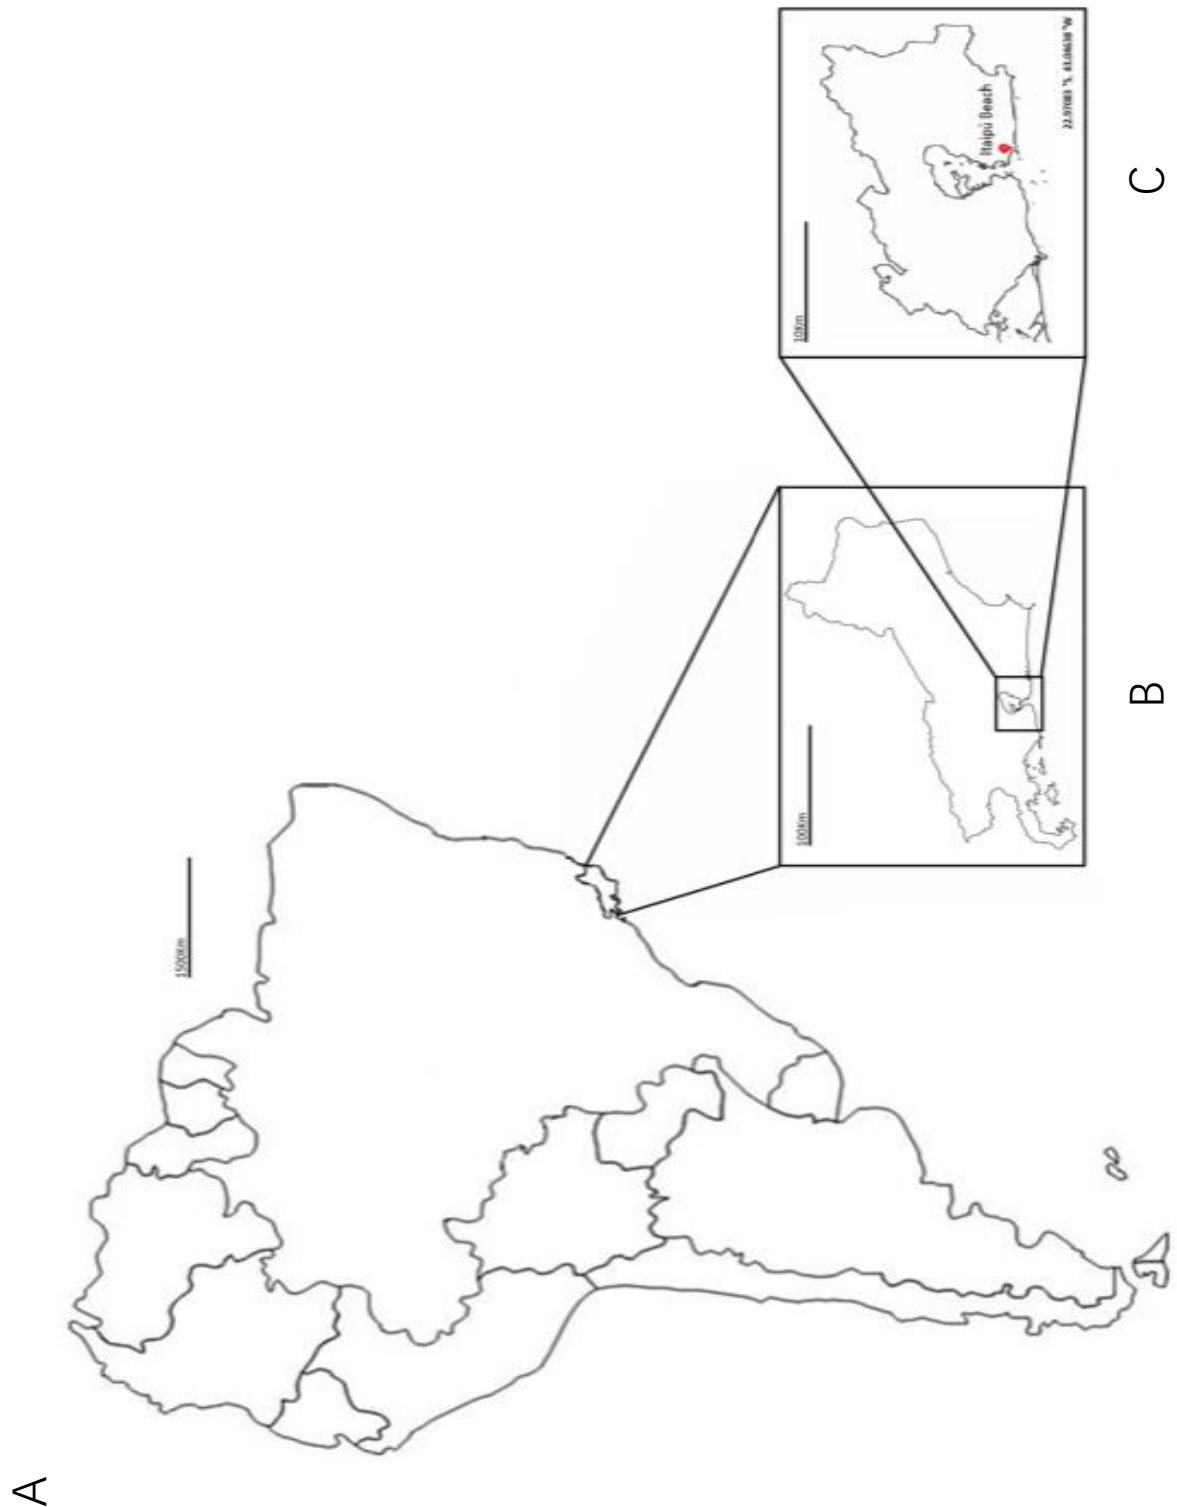

Supplement: s1 [file s1]
